# Supplementary material
Source: PubMed Central journal article supplement (PMC4706362)
Supplement: ja509551m_si_001.pdf [file ja509551m_si_001.pdf]

# Supporting Information

## Extraction of Photogenerated Electrons and Holes from a COF Integrated Heterojunction

Mona Calik,<sup>‡</sup> Florian Auras,<sup>‡</sup> Laura M. Salonen,<sup>‡</sup> Kathrin Bader, Irene Grill, Matthias Handloser, Dana D. Medina, Mirjam Dogru, Florian Löbermann, Dirk Trauner, Achim Hartschuh, Thomas Bein\*

Department of Chemistry and Center for NanoScience (CeNS), University of Munich (LMU), Butenandtstrasse 5-13, 81377 Munich, Germany

### Table of contents

|            |                                                                                |
|------------|--------------------------------------------------------------------------------|
| Section 1  | Materials and methods                                                          |
| Section 2  | Synthesis                                                                      |
| Section 3  | Simulation of the TP-Por COF crystal structure                                 |
| Section 4  | X-ray diffraction analysis of TP-Por COF thin films                            |
| Section 5  | Krypton sorption on COF thin films                                             |
| Section 6  | IR spectroscopy                                                                |
| Section 7  | UV-Vis spectroscopy                                                            |
| Section 8  | Differential pulse voltammetry and optical band gap of the COF building blocks |
| Section 9  | Additional optoelectronic characterization of the photovoltaic devices         |
| Section 10 | NMR spectroscopy                                                               |
| Section 11 | References                                                                     |

### Abbreviations

BET = Brunauer–Emmett–Teller; CC = column chromatography; DDQ = 2,3-dichloro-5,6-dicyano-1,4-benzoquinone; EtOAc = ethyl acetate; FWHM = full width at half maximum; HHTP = 2,3,6,7,10,11-hexahydroxytriphenylene; Mp = melting point; QSDFT = quenched solid density functional theory;  $R_f$  = retardation factor; RT = room temperature; THF = tetrahydrofuran.

## Section 1: Materials and methods

Unless stated otherwise, all reactions were performed in oven-dried glassware under a positive pressure of Ar. Commercial reagents and solvents were used as received with the exception of pyrrole, which was distilled prior to use using a rotary evaporator. Reactions were stirred magnetically and monitored by NMR spectroscopy or analytical thin-layer chromatography (TLC) using E. Merck 0.25 mm silica gel 60 F254 pre-coated glass plates. TLC plates were visualized by exposure to ultraviolet light (254 nm). Flash column chromatography was performed employing silica gel (60 Å, 40–63 µm, Merck).

Nuclear magnetic resonance (NMR) spectra were recorded on Varian VNMRS 300, VNMRS 400, INOVA 400 or VNMRS 600 spectrometers. Proton chemical shifts are expressed in parts per million ( $\delta$  scale) and are calibrated using residual undeuterated solvent peak as an internal reference (CDCl<sub>3</sub>:  $\delta$  7.26; THF-*d*<sub>8</sub>:  $\delta$  1.72, 3.58). Data for <sup>1</sup>H NMR spectra are reported as follows: chemical shift ( $\delta$  ppm) (multiplicity, coupling constant/Hz, integration). Multiplicities are reported as follows: s = singlet, d = doublet, t = triplet, q = quartet, m = multiplet, br = broad, or combinations thereof. Carbon chemical shifts are expressed in ppm ( $\delta$  scale) and are referenced to the carbon resonances of the solvent (CDCl<sub>3</sub>:  $\delta$  77.16; THF-*d*<sub>8</sub>:  $\delta$  67.21, 25.31).

Infrared (IR) spectra were recorded on a Perkin Elmer Spectrum BX II FT-IR system and a Thermo Scientific Nicolet™ 6700 FT-IR spectrometer in transmission mode. IR data is reported in frequency of absorption (cm<sup>-1</sup>).

Mass spectrometry (MS) experiments were performed on a Thermo Finnigan MAT 95 (EI) or on a Thermo Finnigan LTQ FT (ESI) instrument.

The nitrogen sorption isotherm was recorded on a Quantachrome Autosorb 1 at 77.35 K in a pressure range from  $p/p^0 = 0.001$  to 0.98. Prior to the measurement of the sorption isotherm the sample was heated for 24 h at 120°C under turbomolecular pump vacuum. For the evaluation of the surface area the BET model was applied between 0.05 and 0.2  $p/p^0$ . The calculation of the pore size distribution was done using the QSDFT equilibrium model with a carbon kernel for cylindrical pores.

The permanent porosity of COF films was assessed by a krypton sorption measurement of degassed films (24 h at RT *in vacuo*). The isotherm was recorded at 77 K on a Quantachrome autosorb iQ instrument in a pressure range from  $p/p^0 = 0.002$  to 0.95 using a vacuum volumetric technique.

X-ray diffraction (XRD) measurements were performed using a Bruker D8 Discover with Ni-filtered Cu K<sub>α</sub> radiation and a LynxEye position-sensitive detector.

Transmission electron microscopy was performed on an FEI Titan 80-300 equipped with a field emission gun operated at 80 kV. Scanning electron microscopy (SEM) images were recorded with a JEOL 6500F field emission microscope operated at 5 kV using a secondary electron detector.

UV-Vis spectra were recorded using a Perkin-Elmer Lambda 1050 spectrometer equipped with a 150 mm integrating sphere. Absorbance spectra of COF thin films were corrected for the transmission of the substrate and reflection losses.

Photoluminescence (PL) measurements were performed using a home-built setup consisting of a Horiba Jobin Yvon iHR 320 monochromator equipped with a photomultiplier tube and a liquid N<sub>2</sub>-

cooled InGaAs detector. The samples were illuminated with a pulsed (83 Hz) 405 nm LED at a light intensity of 500 mW cm<sup>-2</sup>.

Differential pulse voltammetry (DPV) was measured using 50 μM solutions of **1** and HHTP in acetonitrile or a 3:5 mixture of acetonitrile/1,4-dioxane, respectively, with 0.1 M tetrabutylammonium hexafluorophosphate as electrolyte and 0.1 mM ferrocene as internal reference. Measurements were performed with a Metrohm Autolab PGSTAT302N potentiostat, using Pt wires as the working electrode and counter electrode and a saturated Ag/AgCl reference electrode (Sigma Aldrich, 0.197 V vs. SHE).

Photovoltaic devices were tested under illumination from an AM1.5G solar simulator (Solar Light Model 16S), which was calibrated to 100 mW cm<sup>-2</sup> using a Fraunhofer ISE certified KG5 filtered silicon cell. Current-voltage (*J-V*) curves were recorded with a Keithley 2400 source-measure unit.

External quantum efficiency (EQE) measurements were performed at short circuit unless stated otherwise, and referenced to a Si photodiode with NIST traceable calibration. The device under test was illuminated with chopped (*f* = 7 Hz) monochromatic light. The current response was detected via a lock-in amplifier (Signal Recovery SR7230) with a low-noise pre-amplifier.

Photoinduced absorption measurements were carried out in transmission geometry using a stabilized continuum white light source in combination with a chopped excitation laser (*f*<sub>chop</sub> = 1 kHz, λ<sub>exc</sub> = 470 nm). Photoinduced changes in transmission through the thin film were recorded by a photodiode via lock-in detection (SRS 830). Photoinduced absorption spectra in the transparency range of the film were recorded by selecting different detection wavelengths using narrow bandpass filters each having a FWHM of 10 nm.

## Section 2: Synthesis

The synthesis of boronic acid porphyrin **1** started with preparation of dipyrromethane **2**<sup>[1]</sup> from pyrrole (**3**) and paraformaldehyde (**4**) (Scheme S1). Then, in a procedure adapted from the literature,<sup>[2]</sup> boronic ester-bearing aldehyde **5**, previously obtained by protection of boronic acid **6**, was reacted with dipyrromethane to yield porphyrin **7** in 30% yield. Finally, acidic deprotection of the boronic ester moieties gave access to porphyrin **1** in 77% yield.

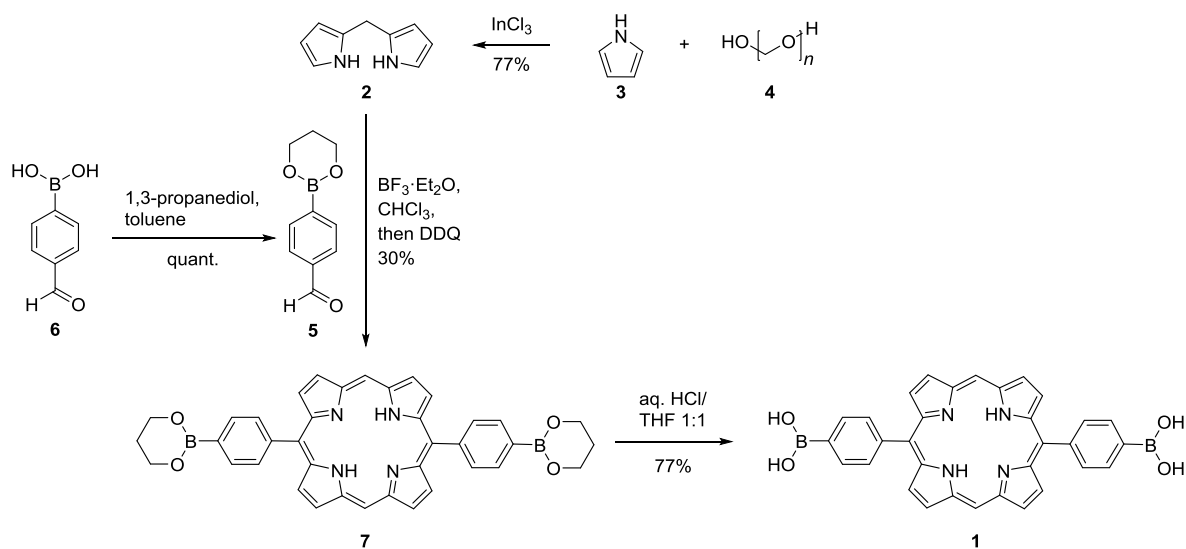

**Scheme S1.** Synthesis of boronic acid porphyrin **1**.

## 5,15-Bis(4-boronophenyl)porphyrin (**1**)

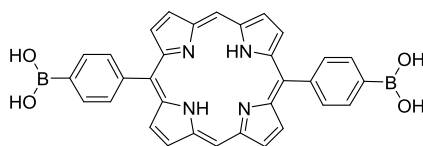

Porphyrin **7** (1.08 g, 1.71 mmol, 1 equiv.) was stirred in a mixture of THF (450 mL) and aq. HCl solution (450 mL, pH = 1) in the dark at RT for 24 h. Then, CH<sub>2</sub>Cl<sub>2</sub> (650 mL) was added, and the precipitated product collected by filtration. The solid was suspended in MeOH, centrifuged, and MeOH was decanted off. The procedure was repeated three times to give **1** (640 mg, 77%) as purple solid.

Mp > 305 °C (decomp); <sup>1</sup>H NMR (400 MHz, THF-*d*<sub>8</sub>+3 drops of D<sub>2</sub>O): 8.20 (d, *J* = 8.1 Hz, 4H), 8.30 (d, *J* = 8.1 Hz, 4H), 9.03 (d, *J* = 4.6 Hz, 4H), 9.47 (d, *J* = 4.6 Hz), 10.42 (s, 2H); <sup>13</sup>C NMR (100 MHz, THF-*d*<sub>8</sub>): 106.2, 111.1, 120.1, 131.5, 132.7, 133.9, 134.9, 143.9 (2 signals invisible); IR (ATR): 3282, 1604, 1577, 1471, 1395, 1321, 1236, 1197, 1145, 1103, 1008, 973, 954, 850, 786, 745, 732, 718, 688; HR-ESI-MS: *m/z*: 551.2048 ([*M*+H]<sup>+</sup>, calculated for C<sub>32</sub>H<sub>25</sub>B<sub>2</sub>N<sub>4</sub>O<sub>4</sub><sup>+</sup>: 551.2057).

## Di(1*H*-pyrrol-2-yl)methane<sup>[1]</sup> (**2**)

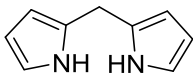

A suspension of paraformaldehyde (**4**) (1.63 g, 54.4 mmol, 1 equiv.) in pyrrole (**3**) (350 mL, 5040 mmol, 93 equiv.) was degassed with Ar for 15 min. The mixture was heated to 55 °C for 10 min before the addition of InCl<sub>3</sub> (1.19 g, 5.38 mmol, 0.1 equiv.). The mixture was stirred at 55 °C for 3 h, cooled down, and treated with powdered NaOH (7.20 g, 180 mmol, 3.3 equiv.). After 1 h at RT, the mixture was filtered over celite, washed with pyrrole, and evaporated to dryness. Purification by CC (SiO<sub>2</sub>; packed with iso-hexane, elution iso-hexane/EtOAc 9:1) gave **2** (6.15 g, 77%) as off-white solid.

*R*<sub>f</sub> = 0.57 (iso-hexane/EtOAc 2:1); <sup>1</sup>H NMR (600 MHz, CDCl<sub>3</sub>): 3.97 (s, 2H), 6.05 (dddt, *J* = 3.3, 2.5, 1.6, 0.8 Hz, 2H), 6.16 (q, *J* = 2.9 Hz, 2H), 6.64 (td, *J* = 2.6, 1.6 Hz, 2H), 7.78 (br s, 2H); <sup>13</sup>C NMR (150 MHz, CDCl<sub>3</sub>): 26.5, 106.5, 108.5, 117.4, 129.2; HR-EI-MS: *m/z* (%): 146.0837 (100, [*M*]<sup>+</sup>, calculated for C<sub>9</sub>H<sub>10</sub>N<sub>2</sub><sup>+</sup>: 146.0844).

#### 4-(1,3,2-Dioxaborinan-2-yl)benzaldehyde<sup>[3]</sup> (**5**)

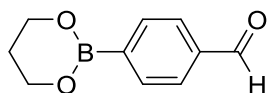

In a flask equipped with a Dean-Stark trap, a suspension of 4-formylphenylboronic acid (**6**) (10.2 g, 68.0 mmol, 1 equiv.) and 1,3-propanediol (5.20 mL, 72.4 mmol, 1.1 equiv.) in toluene (510 mL) was heated at 135 °C for 5 h. The mixture was evaporated to dryness to give **5** (13 g, quant.) as white solid.

Mp = 60–62 °C; <sup>1</sup>H NMR (300 MHz, CDCl<sub>3</sub>): 2.05–2.12 (m, 2H), 4.19 (t, *J* = 5.5 Hz, 4H), 7.84 (d, *J* = 8.3 Hz, 2H), 7.92 (d, *J* = 8.1 Hz, 2H), 10.04 (s, 1H); <sup>13</sup>C NMR (75 MHz, CDCl<sub>3</sub>): 27.5, 62.3, 128.8, 134.3, 137.9, 193.0 (1 signal invisible); IR (ATR): 2976, 2949, 2897, 2823, 2731, 1695, 1658, 1564, 1505, 1486, 1477, 1429, 1386, 1340, 1308, 1296, 1268, 1207, 1175, 1153, 1126, 1104, 1001, 921, 852, 826, 727, 672; HR-EI-MS: *m/z* (%): 189.0717 (100, [*M*-H]<sup>+</sup>, calculated for C<sub>10</sub>H<sub>10</sub>BO<sub>3</sub><sup>+</sup>: 189.0723).

#### 5,15-Bis(4-(1,3,2-dioxaborinan-2-yl)-phenyl)porphyrin (**7**)

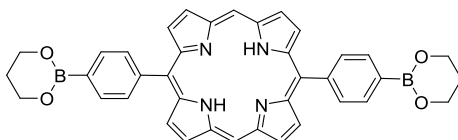

Compounds **2** (1.66 g, 11.4 mmol, 1 equiv.) and **5** (2.14 g, 11.2 mmol, 1 equiv.) were dissolved in anhydrous CHCl<sub>3</sub> (1 L) under Ar, and the mixture was degassed with Ar for 15 min. The reaction mixture was cooled to 0 °C, BF<sub>3</sub>•OEt<sub>2</sub> (320 μL, 2.53 mmol, 0.2 equiv.) was added, and the mixture was stirred for 3 h at RT. Then, DDQ (4.16 g, 18.3 mmol, 1.6 equiv.) was added in one portion, and the mixture was stirred overnight at RT. The mixture was filtered over celite, and poured on to a column of silica (CH<sub>2</sub>Cl<sub>2</sub>; elution CH<sub>2</sub>Cl<sub>2</sub>/MeOH 100:1). The collected purple solid was recrystallized from CHCl<sub>3</sub> to give **7** (1.08 g, 30%) as dark purple solid.

*R*<sub>f</sub> = 0.44 (CH<sub>2</sub>Cl<sub>2</sub>/MeOH 95:5); Mp = 370 °C (decomp); <sup>1</sup>H NMR (600 MHz, CDCl<sub>3</sub>): -3.10 (s, 2H), 2.25 (quintet, *J* = 5.5 Hz, 4H), 4.37 (t, *J* = 5.6 Hz, 8H), 8.21–8.28 (m, 8H), 9.07 (d, *J* = 4.5 Hz, 4H), 9.39 (d, *J* = 4.5 Hz, 4H), 10.31 (s, 2H); <sup>13</sup>C NMR (150 MHz, CDCl<sub>3</sub>): 27.8, 62.4, 105.4, 119.4, 131.2, 131.7, 132.4, 134.5, 143.7, 145.3, 147.2 (1 signal invisible); IR (ATR): 2935, 2884, 1603, 1579, 1546, 1478, 1417, 1389, 1334, 1302, 1272, 1209, 1150, 1123, 1053, 1005, 992, 986, 972, 955, 864, 855, 795, 751, 735, 718, 693, 664; HR-EI-MS: *m/z* (%): 630.2613 (100, [*M*]<sup>+</sup>, calculated for C<sub>38</sub>H<sub>32</sub>B<sub>2</sub>N<sub>4</sub>O<sub>4</sub><sup>+</sup>: 630.2610).

## TP-Por COF

For the synthesis of TP-Por COF 11.5 mg of compound **1** (0.02 mmol, 3 equiv.) and 4.5 mg of HHTP (0.014 mmol, 2 equiv.) were added to a Teflon-lined steel autoclave and dispersed in a solvent mixture of acetonitrile and mesitylene (7:3 v:v, 1 mL). The autoclave was placed in an oven at 120 °C for 72 h. After the time had elapsed, the reaction mixture was allowed to cool down to room temperature and the resulting powder was then collected by filtration through a Hirsch funnel. After washing the product three times with dry toluene it was left under dynamic vacuum to come to complete dryness.

## TP-Por COF films

11.5 mg of compound **1** (0.02 mmol, 3 equiv.) and 4.5 mg HHTP (0.014 mmol, 2 eq) were added to a 100 mL Schott flask and dissolved in a solvent mixture of acetonitrile and mesitylene in a 7:3 v:v ratio (30 mL). The substrates (fused silica or ITO-covered glass), covered with a 10 nm layer of vacuum-deposited MoO<sub>x</sub>, were placed face down in the reaction solution. The flask was heated in an oven at 120 °C for 18 h. After the reaction mixture had cooled down to room temperature, the films were removed from the flask and washed by a short sonication treatment (2 s) in toluene. The obtained films were dried under a nitrogen flow prior to characterization.

## Device fabrication

A stock solution of 5–6 nm ZnO nanocrystals in *n*-BuOH/MeOH/CHCl<sub>3</sub> 88:6:6 v:v:v was prepared following literature procedures.<sup>[4]</sup> This solution was sonicated for 15 min prior to use.

The COF-based device was prepared on ITO-coated glass (VisonTec, 12–15 ohms/sq) slides. A 10 nm thick MoO<sub>x</sub> electron blocking layer was deposited by thermal evaporation. A COF thin film was subsequently grown on this substrate as described above. An electron-selective contact was applied by spin-coating a dispersion of ZnO nanocrystals, resulting in a layer thickness of about 20 nm. The device was completed by thermal evaporation of 80 nm thick Al contacts in high vacuum through a shadow mask, thus defining an active area of 3×3 mm<sup>2</sup> for each device.

For the reference device based on a blend of the building blocks, 1.65 mg (3.0 μmol) of compound **1** and 0.65 mg (2.0 μmol) HHTP were dissolved in 200 μL 1,3-dioxolane and 100 μL MeOH. This solution was spin-cast onto a MoO<sub>x</sub>-coated ITO substrate, yielding an active layer of ~40 nm thickness. Subsequently, a 10 nm layer of poly[(9,9-bis(2,2'-*N,N'*-dimethylaminopropyl)fluorenyl-2,7-diyl)-*alt-co*-(9,9-dioctylfluorenyl-2,7-diyl)] (PFN; Solaris Chem), serving as an electron-selective contact, was spin-coated from a 2 mg mL<sup>-1</sup> methanol solution containing 5 μL glacial acetic acid. The device was completed by thermal evaporation of 120 nm Al contacts.

### Section 3: Simulation of the TP-Por COF crystal structure

To determine the crystal structure of the obtained product, a powder diffraction pattern was calculated based on a simulated crystal structure. The unit cell was constructed using the Materials Studio software and optimized by force field calculations. Due to the non-planar porphyrin building block, the unit cell is limited to a trigonal  $P3$  symmetry in the case of an eclipsed stacked structure and  $P6_3$  symmetry for a staggered arrangement. The comparison of the calculated pattern with the experimental data identified the obtained structure as AA stacked TP-Por COF.

**Table S1.** Refined crystal data.

|                 |                                                 |
|-----------------|-------------------------------------------------|
| Formula         | $C_{132} H_{72} B_6 N_{12} O_{12}$              |
| Formula weight  | 2082.96 g mol <sup>-1</sup>                     |
| Crystal system  | trigonal                                        |
| Space-group     | $P3$                                            |
| Cell parameters | $a = b = 52.2 \text{ \AA}, c = 3.8 \text{ \AA}$ |
| Cell volume     | 8977 $\text{\AA}^3$                             |

**Table S2.** Fractional atomic coordinates.

| Atom | Wyck. | x       | y       | z        |
|------|-------|---------|---------|----------|
| C1   | 3d    | 0.91955 | 0.94724 | -0.01394 |
| N2   | 3d    | 0.69905 | 0.87622 | -0.01391 |
| C3   | 3d    | 0.72863 | 0.88841 | 0.02061  |
| C4   | 3d    | 0.742   | 0.91883 | 0.06597  |
| C5   | 3d    | 0.71977 | 0.92569 | 0.05331  |
| C6   | 3d    | 0.82388 | 0.9315  | -0.21349 |
| C7   | 3d    | 0.793   | 0.91588 | -0.21168 |
| C8   | 3d    | 0.9457  | 1.00046 | -0.03098 |
| C9   | 3d    | 0.97289 | 1.00079 | -0.02418 |
| C10  | 3d    | 0.4139  | 0.72073 | 0.03347  |
| N11  | 3d    | 0.63444 | 0.79159 | 0.03275  |
| C12  | 3d    | 0.63945 | 0.76894 | 0.08877  |
| C13  | 3d    | 0.60489 | 0.77964 | 0.06862  |
| C14  | 3d    | 0.59155 | 0.74965 | 0.15129  |
| C15  | 3d    | 0.61379 | 0.74277 | 0.16147  |
| C16  | 3d    | 0.50943 | 0.73532 | -0.15931 |
| C17  | 3d    | 0.54032 | 0.75089 | -0.16343 |
| O18  | 3d    | 0.44211 | 0.74513 | 0.04853  |
| C19  | 3d    | 0.38758 | 0.66751 | 0.00825  |
| C20  | 3d    | 0.36041 | 0.66725 | 0.02005  |

| Atom | Wyck. | x       | y       | z        |
|------|-------|---------|---------|----------|
| C28  | 3d    | 0.38765 | 0.72147 | 0.03575  |
| C29  | 3d    | 0.36045 | 0.6946  | 0.02411  |
| C30  | 3d    | 0.91949 | 0.97347 | -0.03042 |
| N31  | 3d    | 0.69904 | 0.82386 | 0.02666  |
| C32  | 3d    | 0.69399 | 0.79595 | 0.0092   |
| C33  | 3d    | 0.72858 | 0.84119 | -0.01499 |
| C34  | 3d    | 0.74185 | 0.82408 | -0.06292 |
| C35  | 3d    | 0.71962 | 0.795   | -0.04449 |
| C36  | 3d    | 0.82426 | 0.89354 | 0.189    |
| C37  | 3d    | 0.79337 | 0.87827 | 0.19712  |
| O38  | 3d    | 0.89131 | 0.96966 | -0.04227 |
| C39  | 3d    | 0.94583 | 0.94658 | -0.01434 |
| C40  | 3d    | 0.66674 | 0.89724 | -0.03767 |
| C41  | 3d    | 0.66672 | 0.77056 | 0.05815  |
| C42  | 3d    | 0.83951 | 0.92024 | -0.01474 |
| B43  | 3d    | 0.87376 | 0.9374  | -0.01955 |
| C44  | 3d    | 0.5895  | 0.79531 | 0.01666  |
| C45  | 3d    | 0.49401 | 0.74759 | 0.02058  |
| C46  | 3d    | 0.55629 | 0.77871 | 0.01841  |
| B47  | 3d    | 0.45971 | 0.73047 | 0.02151  |



|     |    |         |         |          |
|-----|----|---------|---------|----------|
| C21 | 3d | 0.41387 | 0.69447 | 0.01038  |
| C22 | 3d | 0.63943 | 0.87159 | -0.06308 |
| C23 | 3d | 0.60486 | 0.82636 | -0.03735 |
| C24 | 3d | 0.59148 | 0.843   | -0.11765 |
| C25 | 3d | 0.61372 | 0.8721  | -0.13138 |
| C26 | 3d | 0.50951 | 0.77532 | 0.19948  |
| C27 | 3d | 0.54041 | 0.79061 | 0.20144  |

|     |    |         |         |          |
|-----|----|---------|---------|----------|
| C48 | 3d | 0.69406 | 0.89911 | 0        |
| O49 | 3d | 0.89142 | 0.9228  | 0        |
| N50 | 3d | 0.63444 | 0.84395 | 0        |
| O51 | 3d | 0.44205 | 0.69821 | 0        |
| C52 | 3d | 0.744   | 0.87249 | 0        |
| C53 | 3d | 0.77723 | 0.8891  | 0        |
| C54 | 3d | 0.97284 | 0.97363 | -0.02418 |

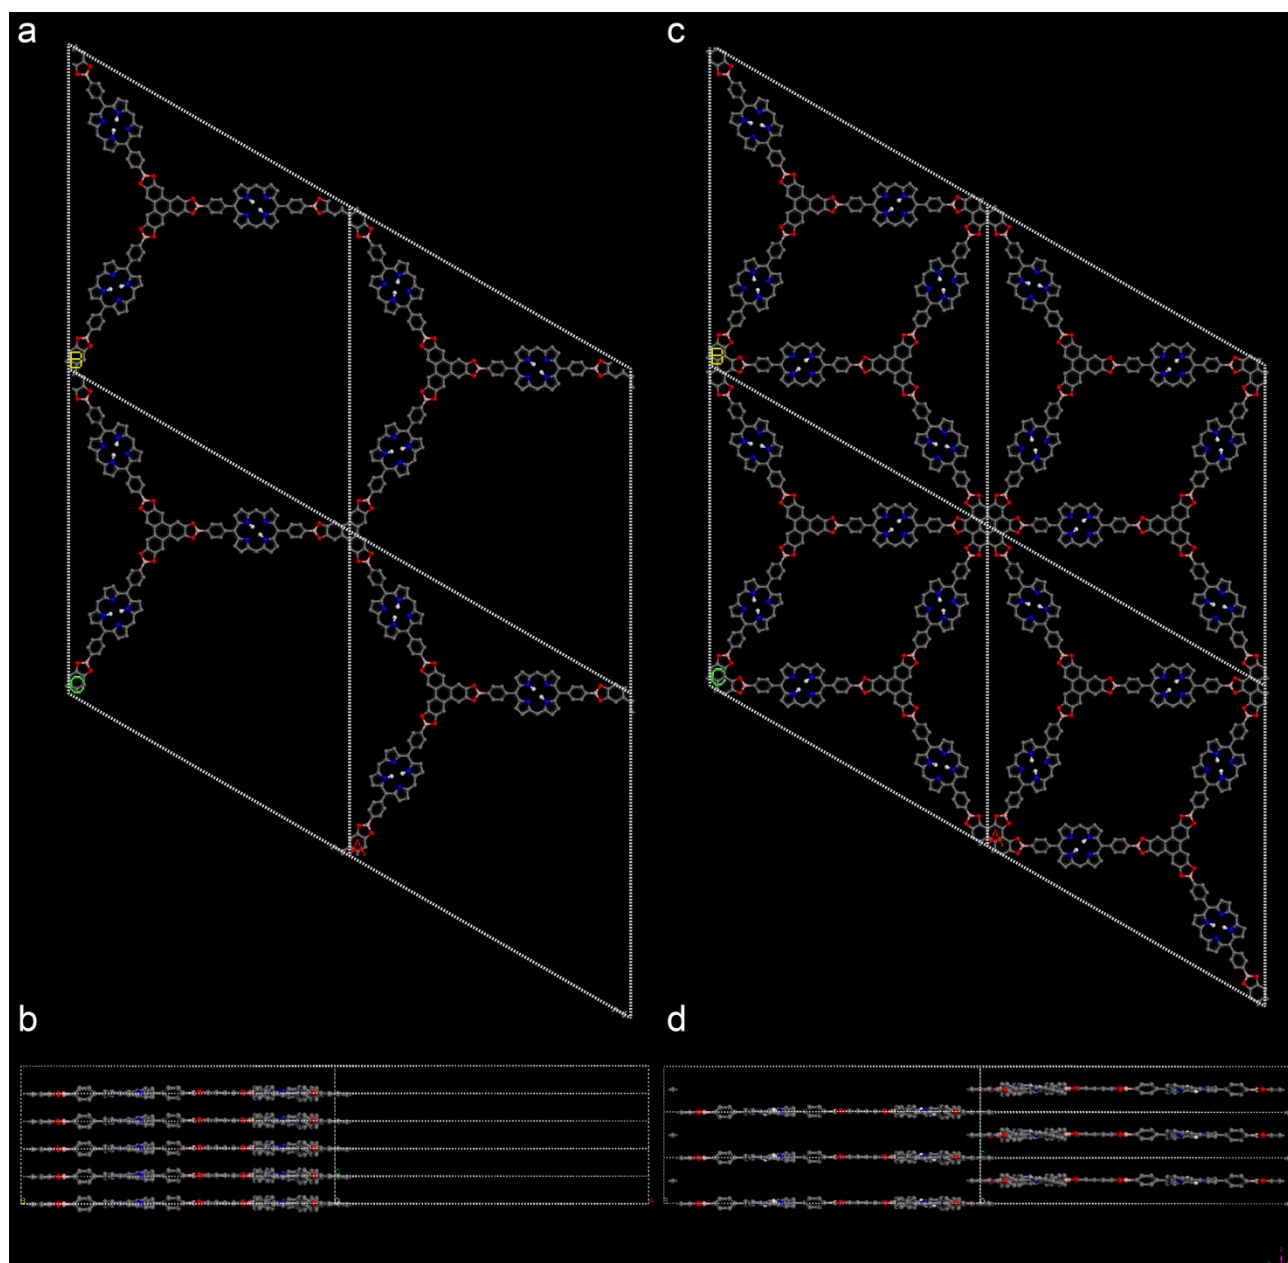

**Figure S1.** Simulation of the crystal lattice of TP-Por COF. a) Top view on the AB plane of 4 unit cells in an eclipsed stacking arrangement with  $P3$  symmetry, b) view along the  $c$ -axis of this fragment with an interlayer distance of 3.8 Å, c) view on the AB plane of 4 calculated unit cells of the TP-Por COF in a (hypothetical) staggered arrangement with  $P6_3$  symmetry, and d) view along the  $c$ -axis with an interlayer distance of 6.5 Å.

#### Section 4: X-ray diffraction analysis of TP-Por COF thin films

To confirm the successful formation of TP-Por COF films on the conductive substrates they were analyzed by XRD in a detector scan mode. The XRD pattern shows a broad reflection at  $24^\circ 2\theta$ , indicating oriented film growth with an interlayer distance of  $3.8 \text{ \AA}$  (Figure S2).

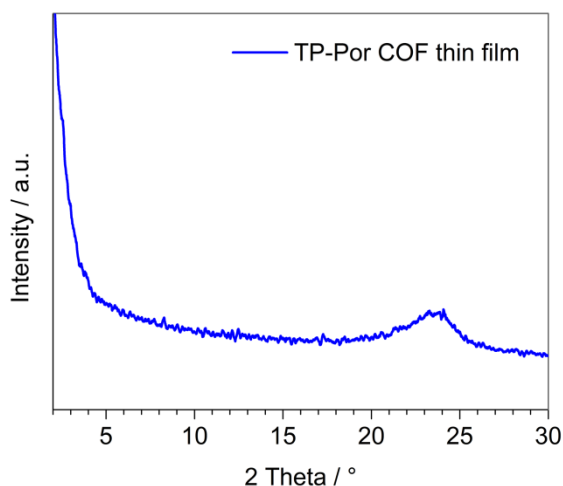

**Figure S2.** X-ray diffraction pattern of a TP-Por COF film measured in detector scan mode.

#### Section 5: Krypton sorption on COF thin films

The accessibility of the open pore system of TP-Por COF films was confirmed by krypton sorption measurements. The obtained type IV isotherm, which is characteristic for mesoporous materials, exhibits a sharp jump from  $0.33$  to  $0.47 P/P_0$ , indicating a narrow pore size distribution.

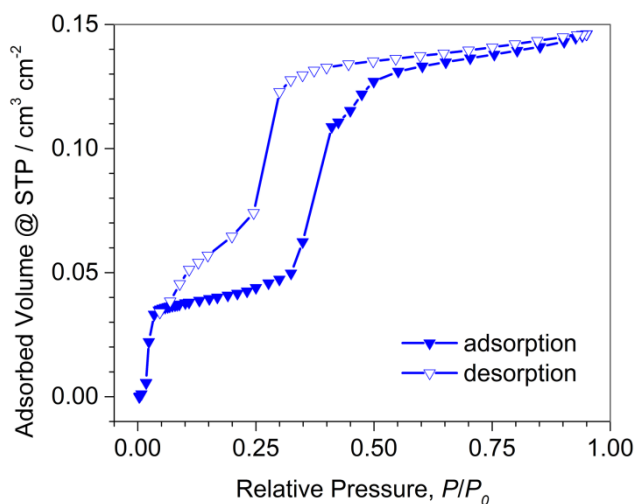

**Figure S3.** Krypton sorption isotherm of a TP-Por COF thin film measured at 77 K.

## Section 6: IR spectroscopy

The successful formation of the boronate ester ring between HHTP and **1** was indicated by Fourier transform infrared (FTIR) spectroscopy through the appearance of the characteristic B–C stretching modes at  $1333\text{ cm}^{-1}$  and  $1261\text{ cm}^{-1}$  (Figure S4).<sup>[5]</sup>

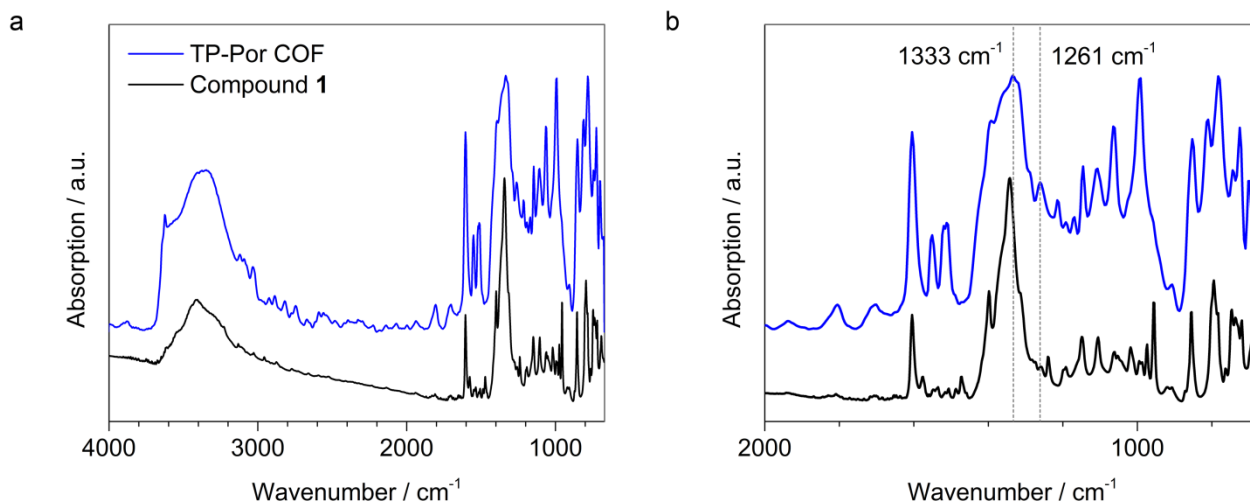

**Figure S4.** IR spectra of a TP-Por COF powder sample and the porphyrin diboronic acid **1**. a) Full range spectrum and b) enlargement of the region below  $2000\text{ cm}^{-1}$  showing the characteristic signals of the B–C stretching modes at  $1333\text{ cm}^{-1}$  and  $1261\text{ cm}^{-1}$ . The spectra were offset for clarity.

**Table S3.** Assignment of the most important IR-bands of TP-Por COF and Compound **1**.

| Wavenumber / $\text{cm}^{-1}$ | Assignment                                                             |
|-------------------------------|------------------------------------------------------------------------|
| 1343                          | asymmetric B–O stretching mode ( $-\text{B}(\text{OH})_2$ )            |
| 1333                          | “breathing” motion within the $\text{C}_2\text{O}_2\text{B}$ ring      |
| 1315                          | symmetric B–C stretching mode ( $-\text{B}(\text{OH})_2$ )             |
| 1261                          | coupled B–C and C=C stretching mode                                    |
| 1213                          | symmetric C–O stretching mode                                          |
| 1062                          | symmetric B–O stretching mode                                          |
| 972                           | coupled B–O stretch and O–H in plane bend ( $-\text{B}(\text{OH})_2$ ) |
| 918                           | symmetric, in plane O–H bending ( $-\text{B}(\text{OH})_2$ )           |

## Section 7: UV-Vis spectroscopy

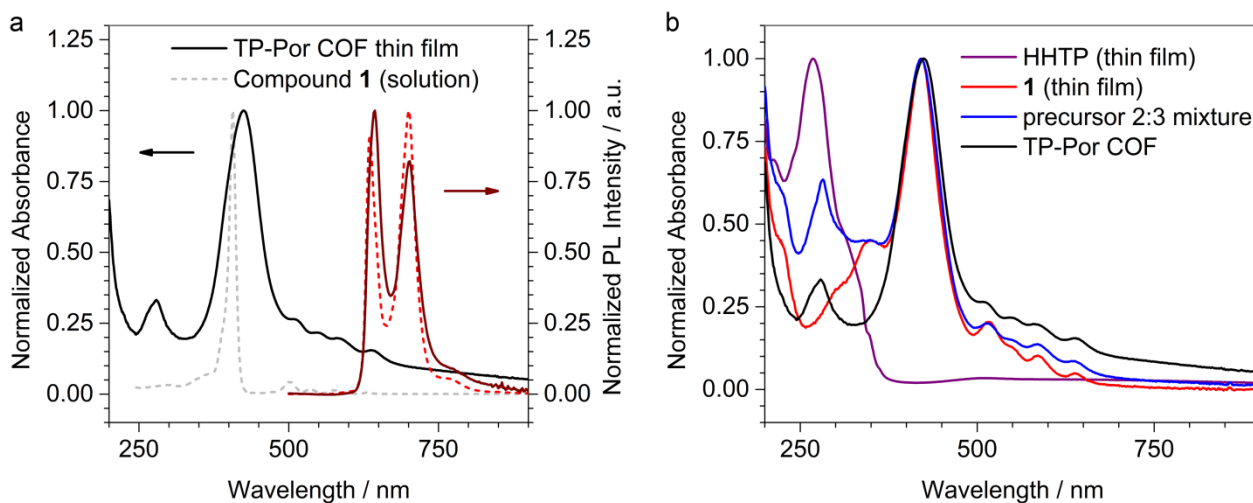

**Figure S5.** a) Absorption (black, grey) and photoluminescence emission spectra (brown, red) of a TP-Por COF thin film (solid line) and a 5  $\mu\text{M}$  dioxane solution of the porphyrin diboronic acid **1** (dashed line). b) Comparison of the UV-Vis spectra of the TP-Por COF film (black) with spin-coated thin films of its precursors (purple and red for HHTP and **1**, respectively) and a 2:3 mixture of these precursors (blue).

## Section 8: Differential pulse voltammetry and optical band gap of the COF building blocks

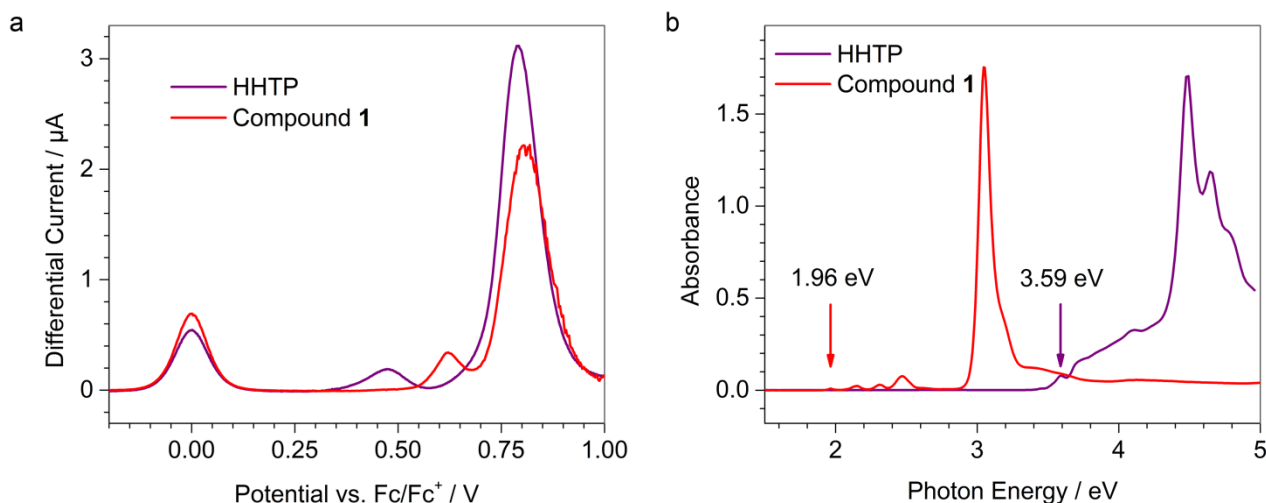

**Figure S6.** a) Differential pulse voltammograms of HHTP (purple) and **1** (red), measured towards more positive potentials (oxidation) and referenced to ferrocene. b) Corresponding UV-Vis spectra of the precursor solutions. The optical band gap is determined from the maximum of the lowest-energy optical transition.

## Section 9: Additional optoelectronic characterization of the photovoltaic devices

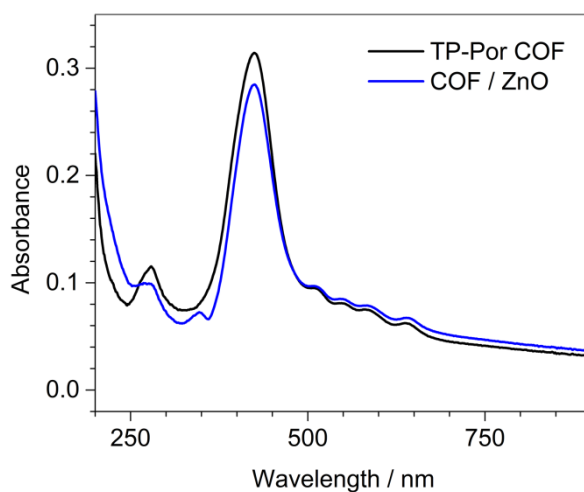

**Figure S7.** Transmission absorption spectra of a TP-Por COF thin film before (black) and after addition of the ZnO electron-selective layer. The additional feature at 347 nm can be ascribed to the ZnO nanocrystals.

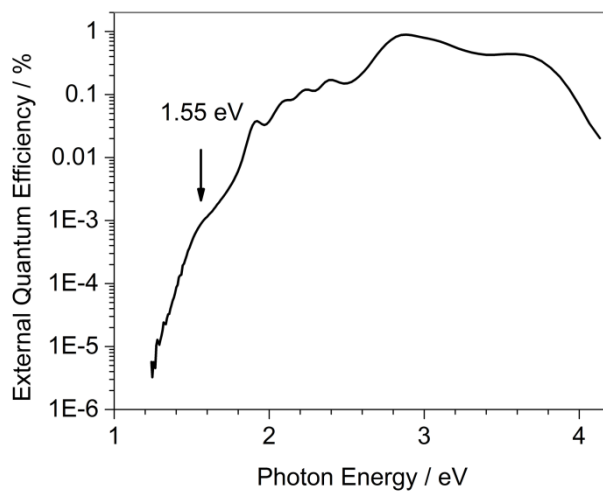

**Figure S8.** External quantum efficiency spectrum of a TP-Por COF-based photovoltaic device in semi-logarithmic representation. The defined feature at 1.55 eV might indicate the formation of a well-defined charge-transfer state inside the donor-acceptor framework.

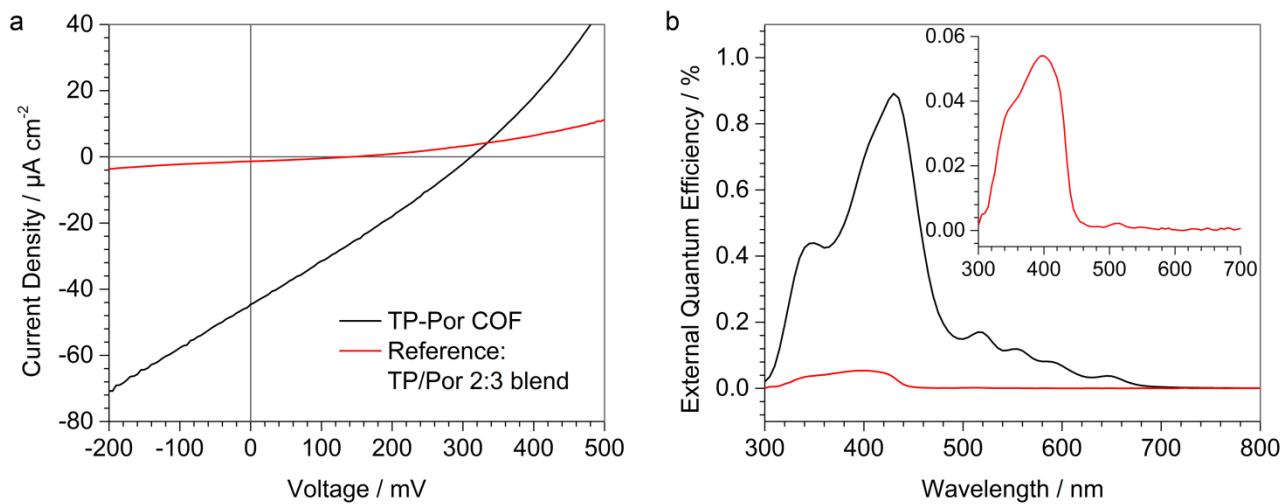

**Figure S9.** Comparison of a) the  $J$ - $V$  curves recorded at  $100 \text{ mW cm}^{-2}$  AM1.5G illumination and b) EQE spectra of the TP-Por COF device (black) and the reference device based on a blend of the COF building blocks (red). The inset shows a magnified representation of the EQE spectrum of the TP/Por blend device.

## Section 10: NMR spectroscopy

### Compound 1

400 MHz, THF- $d_8$ +3 drops of D<sub>2</sub>O

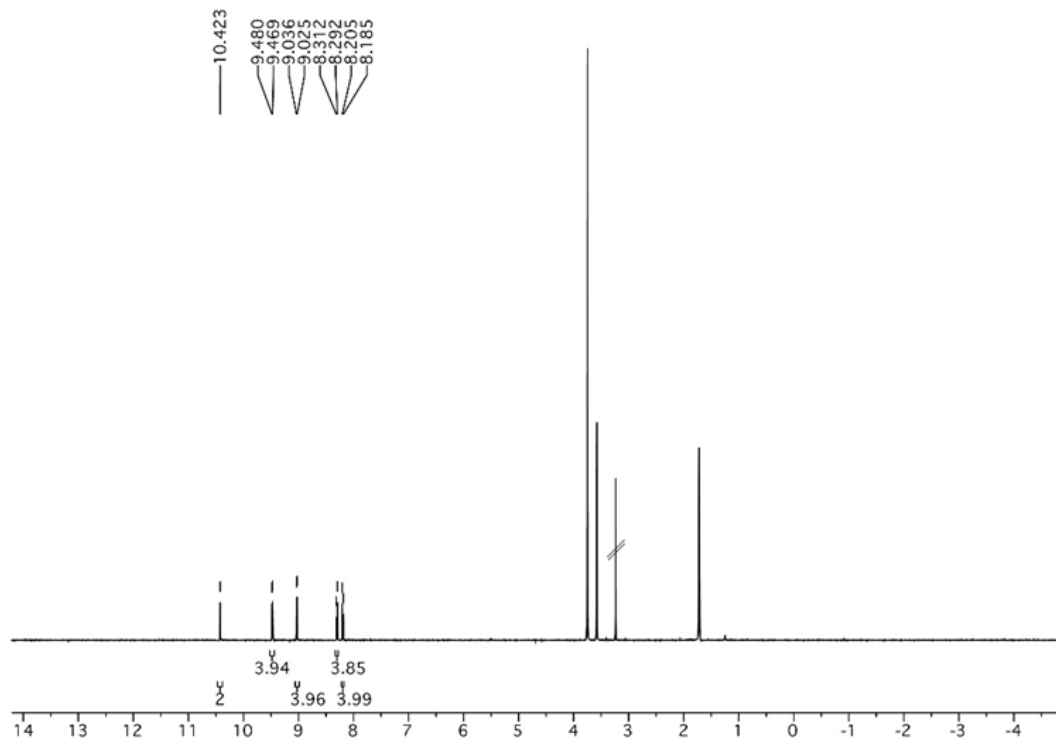

100 MHz, THF- $d_8$ +3 drops of D<sub>2</sub>O

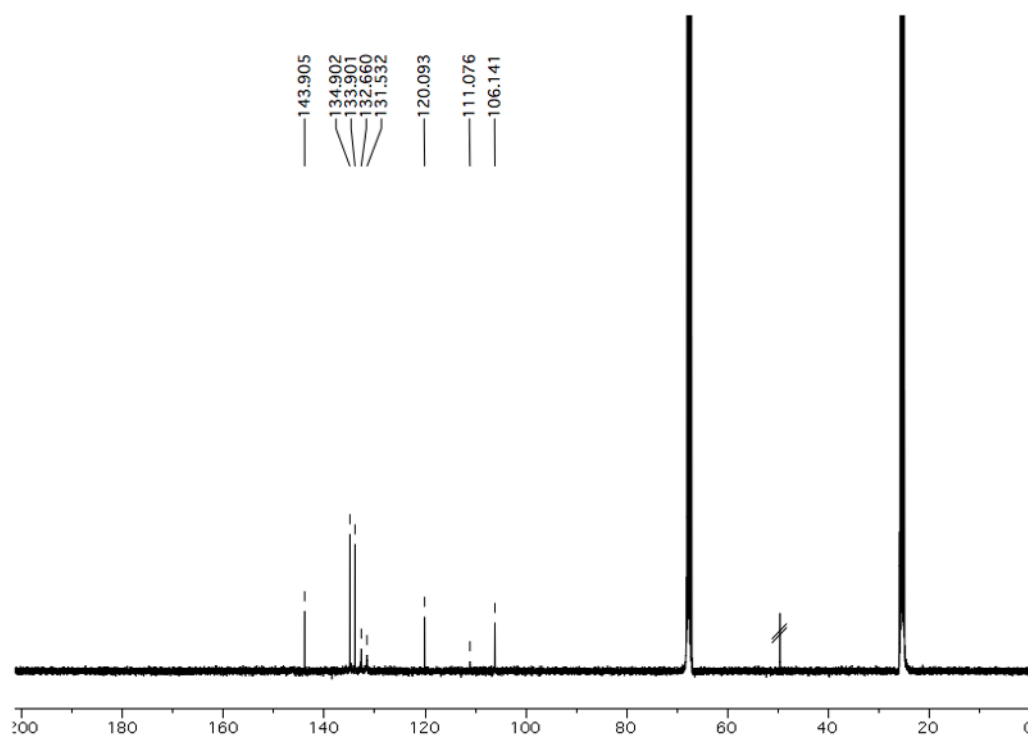

Compound 2

600 MHz, CDCl<sub>3</sub>

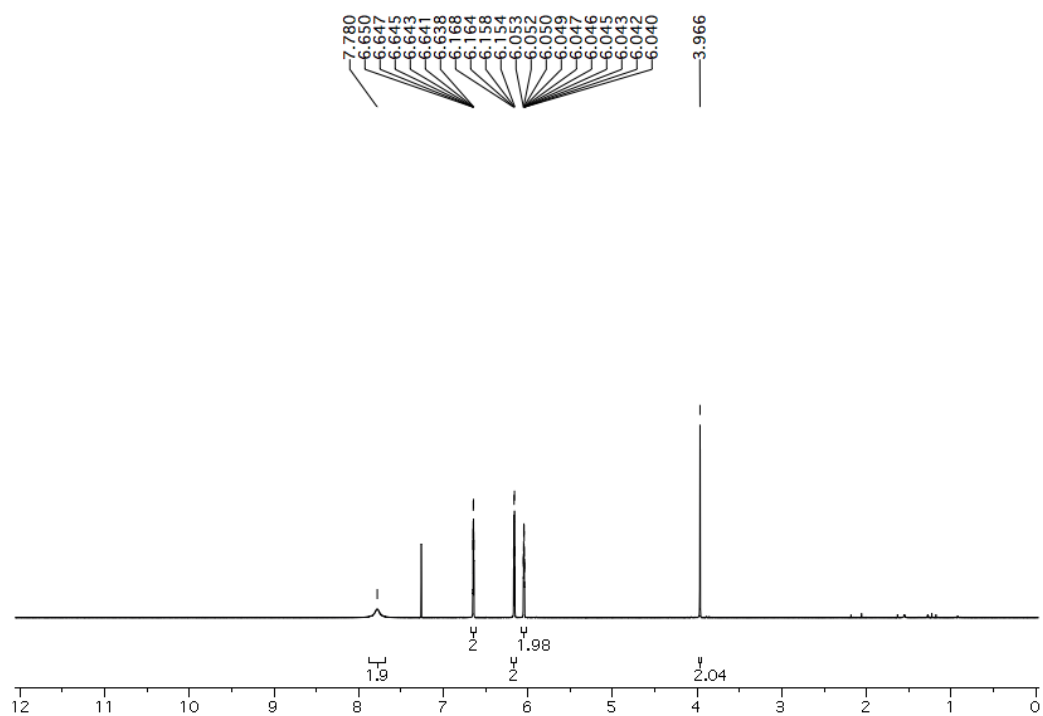

150 MHz, CDCl<sub>3</sub>

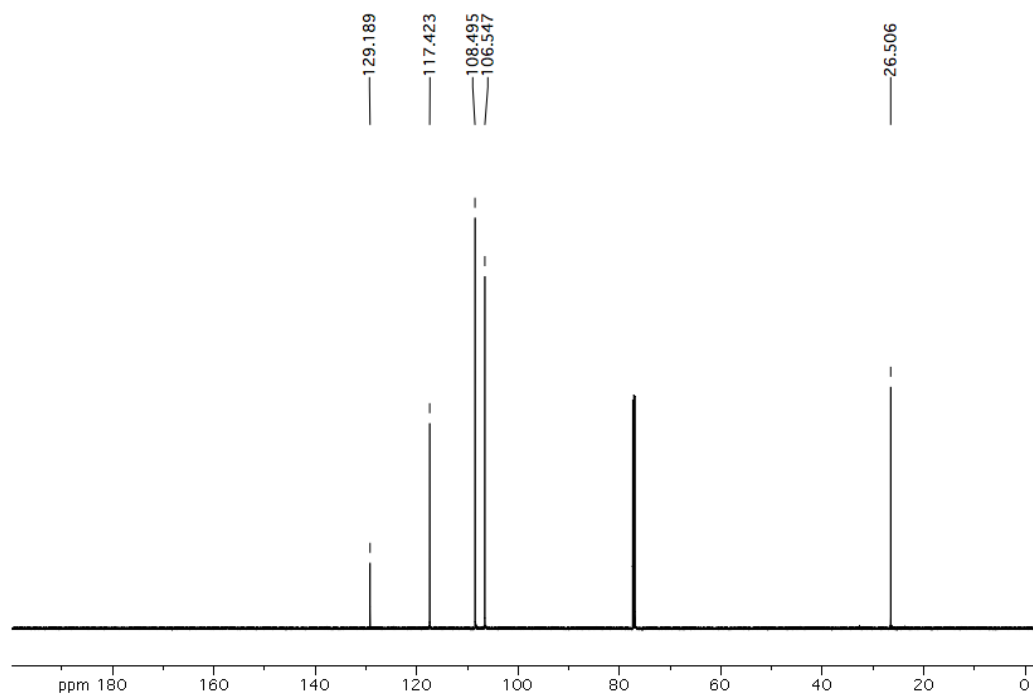



Compound 5

300 MHz, CDCl<sub>3</sub>

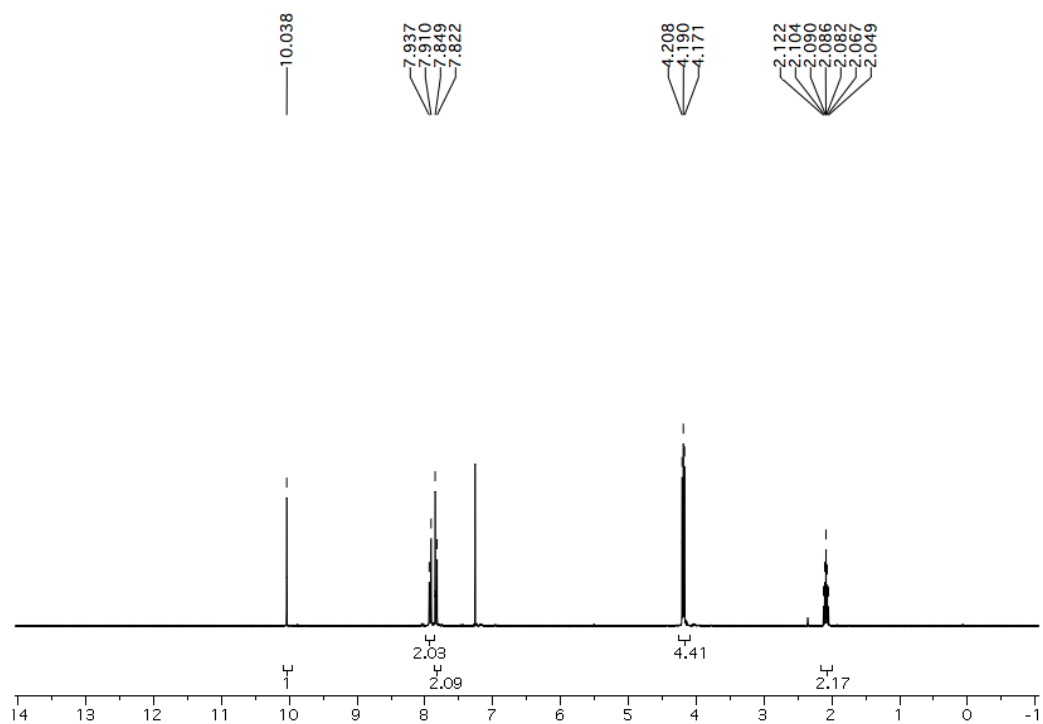

75 MHz, CDCl<sub>3</sub>

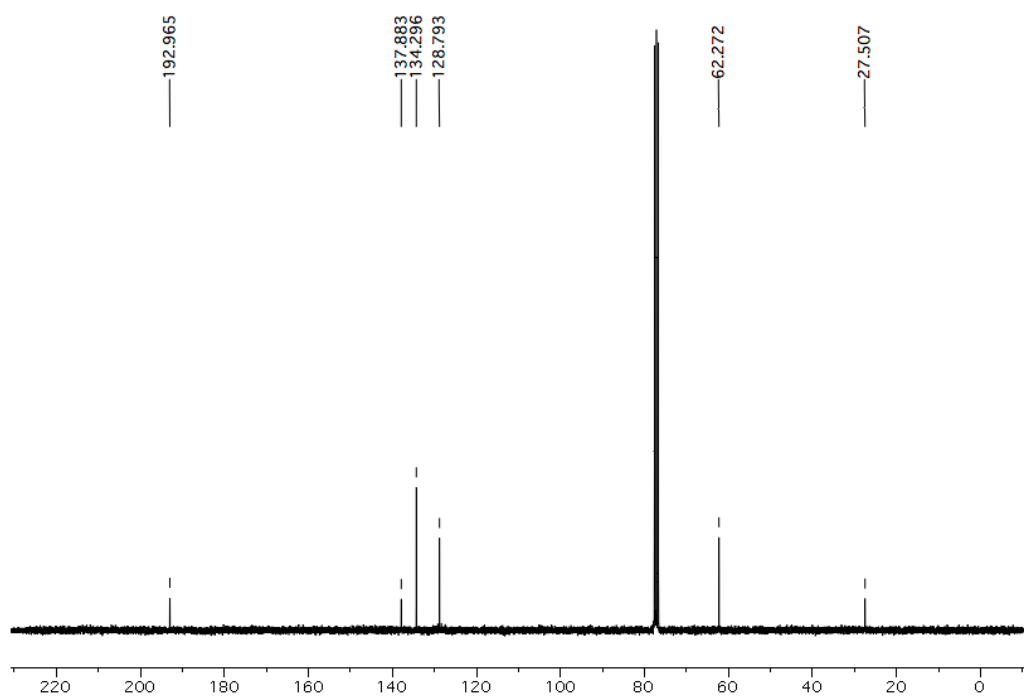

Compound 7

600 MHz, CDCl<sub>3</sub>

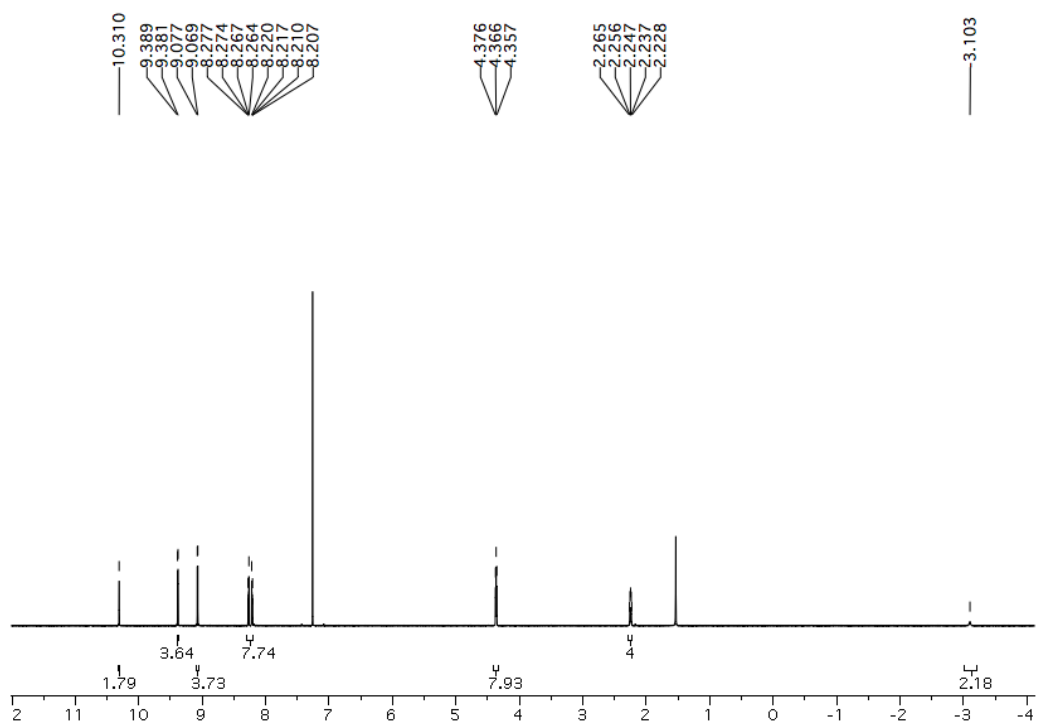

150 MHz, CDCl<sub>3</sub>

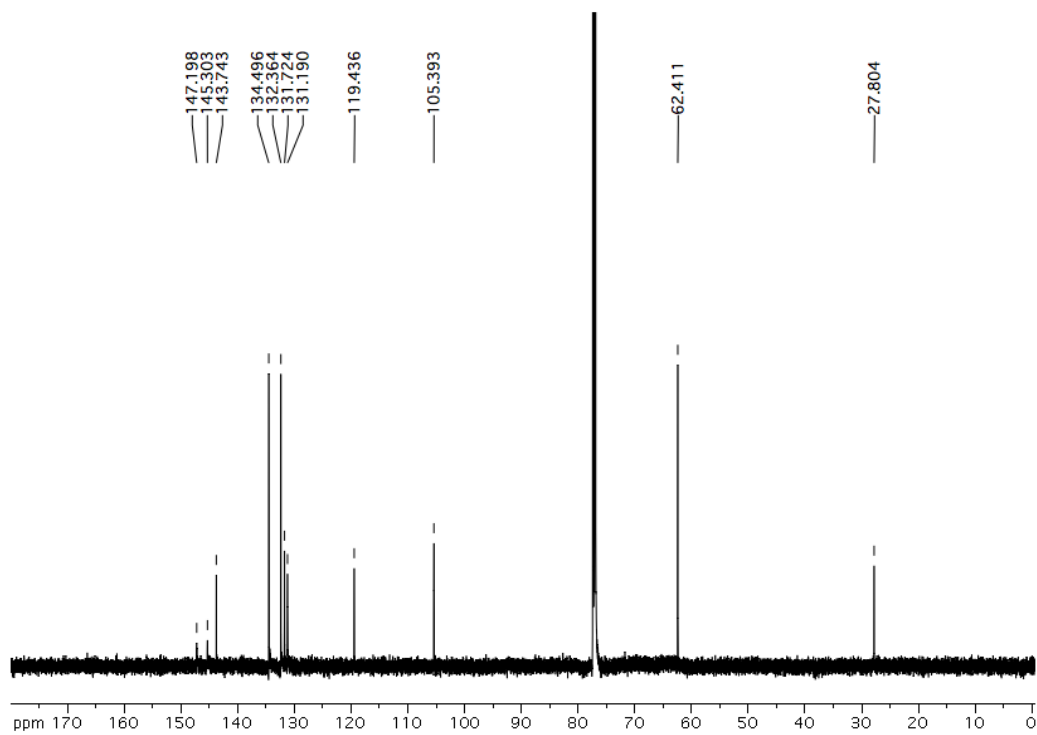

## Section 11: References

- [1] J. K. Laha, S. Dhanalekshmi, M. Taniguchi, A. Ambroise, J. S. Lindsey, *Org. Process Res. Dev.* **2003**, *7*, 799–812.
- [2] X. Feng, L. Chen, Y. Dong, D. Jiang, *Chem. Commun.* **2011**, *47*, 1979–1981.
- [3] T. D. James, K. R. S. Sandanayake, R. Iguchi, S. Skinkai, *J. Am. Chem. Soc.* **1995**, *117*, 8982–8987.
- [4] D. Liu, T. Kelly, *Nat. Photon.* **2013**, *8*, 133–138.
- [5] M. K. Smith, B. H. Northrop, *Chem. Mater.* **2014**, *26*, 3781–3795.
